# Supplementary figures and images for: Selection of MDM2-binding peptides in Escherichia coli using an engineered split intein and aminoglycoside phosphotransferase
Source: Royal Society of Chemistry journal article supplement (doi:10.1039/d4cc06138a), 2025-01-01

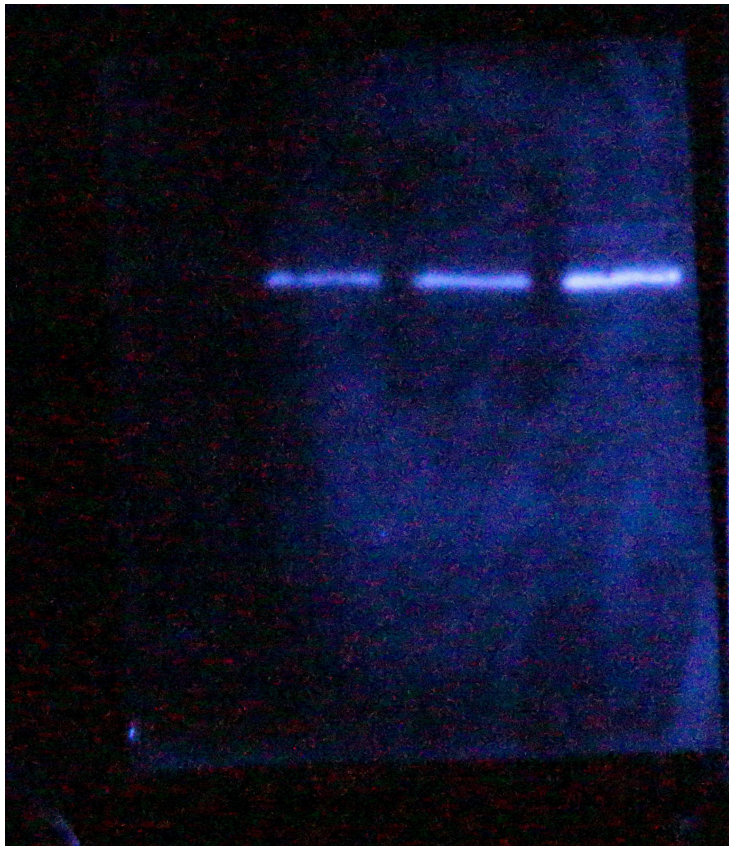

Supplement: d4cc06138a3.pdf [file d4cc06138a3.pdf]

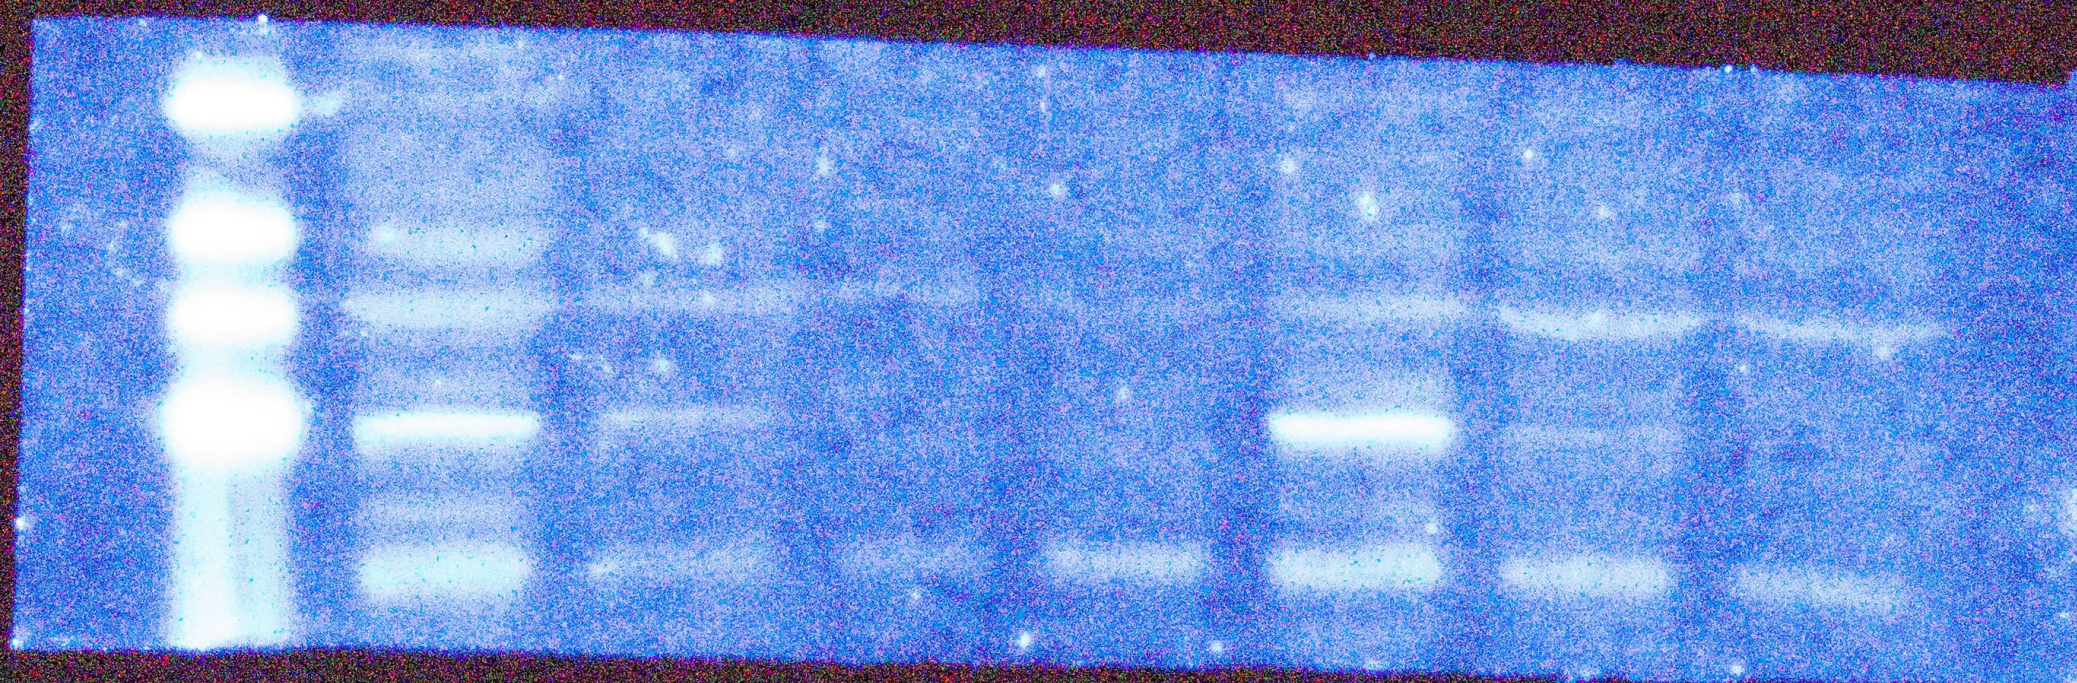

Supplement: d4cc06138a4.pdf [file d4cc06138a4.pdf]
